# Supplementary material
Source: Springer Nature journal article supplement (https://www.springermedizin.de/resource/supplementary/12967_2006_132_MOESM3_ESM.pdf/9575770)
Supplement: MOESM3 [file 9575770]

Table 3: Promax melanoma component pattern loadings for the Staunton *et al* dataset.

---

| Cell line name | Cancer type | Loading |
|----------------|-------------|---------|
| MELAN_MALME3M  | Melanoma    | .629    |
| MELAN_SKMEL2   | Melanoma    | .413    |
| MELAN_SKMEL5   | Melanoma    | .231    |
| MELAN_SKMEL28  | Melanoma    | .603    |
| MELAN_M14      | Melanoma    | .367    |
| MELAN_UACC62   | Melanoma    | .472    |
| MELAN_UACC257  | Melanoma    | .599    |
| COLON_HT29     | Colon       | -.195   |
| COLON_HCC2998  | Colon       | -.086   |
| COLON_HCT116   | Colon       | -.023   |
| COLON_SW620    | Colon       | -.091   |
| COLON_HCT15    | Colon       | -.085   |
| COLON_KM12     | Colon       | -.074   |
| COLON_COLO205  | Colon       | -.141   |
| RENAL_UO31     | Kidney      | -.025   |
| RENAL_A498     | Kidney      | -.046   |
| RENAL_CAKI1    | Kidney      | -.219   |
| RENAL_RXF393   | Kidney      | -.044   |
| RENAL_7860     | Kidney      | -.126   |
| RENAL_ACHN     | Kidney      | .030    |
| RENAL_TK10     | Kidney      | -.129   |
| LEUK_CCRFCM    | Leukemia    | -.131   |
| LEUK_K562      | Leukemia    | -.011   |
| LEUK_MOLT4     | Leukemia    | -.094   |
| LEUK_SRR       | Leukemia    | .086    |
| LEUK_HL60      | Leukemia    | -.116   |
| LEUK_RPMI8266  | Leukemia    | .020    |
| CNS_SNB19      | Brain       | -.076   |
| CNS_SNB75      | Brain       | -.059   |
| CNS_UU251      | Brain       | -.104   |
| CNS_SF268      | Brain       | .089    |
| CNS_SF295      | Brain       | -.052   |
| CNS_SF539      | Brain       | -.021   |

|                    |          |       |
|--------------------|----------|-------|
| NSCLC_NCIH23       | Lung     | -.005 |
| NSCLC_NCIH522      | Lung     | -.064 |
| NSCLC_A549ATCC     | Lung     | -.025 |
| NSCLC_EKVX         | Lung     | .090  |
| NSCLC_NCIH332M     | Lung     | -.113 |
| NSCLC_H460         | Lung     | -.019 |
| NSCLC_HOP62        | Lung     | -.217 |
| NSCLC_HOP92        | Lung     | -.009 |
| NSCLC_NCIH226      | Lung     | -.053 |
|                    |          |       |
| OVAR_OVCAR3        | Ovarian  | -.051 |
| OVAR_OVCAR4        | Ovarian  | -.122 |
| OVAR_OVCAR8        | Ovarian  | -.085 |
| OVAR_IGROV1        | Ovarian  | -.090 |
| OVAR_SKOV3         | Ovarian  | -.194 |
| OVAR_OVCAR5        | Ovarian  | -.064 |
|                    |          |       |
| BREAST_MCF7        | Breast   | -.095 |
| BREAST_MCF7ADRFRES | Breast   | -.174 |
| BREAST_MDAMB231    | Breast   | -.026 |
| BREAST_HS578T      | Breast   | -.078 |
| BREAST_BT549       | Breast   | .032  |
| BREAST_T47D        | Breast   | -.120 |
|                    |          |       |
| PROSTATE_PC3       | Prostate | -.072 |
| PROSTATE_DU145     | Prostate | -.226 |
|                    |          |       |
| RENAL_SN12C        | Kidney   | -.213 |
